# Supplementary material for: The Edwardsiella piscicida thioredoxin-like protein inhibits ASK1-MAPKs signaling cascades to promote pathogenesis during infection
Source: PLoS Pathog. 2019 Jul 17;15(7):e1007917. doi: 10.1371/journal.ppat.1007917 (PMC6636751; doi:10.1371/journal.ppat.1007917)
Supplement: S1 Table — Functional annotation of the top 10 up-regulated genes in macrophage-released EIB202 compared with DMEM-cultured EIB202 based on RNA-seq data [24]. Read_C, the reads count in control group; Read_T, the reads count in EIB202 infection group; RPM, reads of exon model per million mapped reads. (XLSX) [file ppat.1007917.s008.xlsx]

## Sheet: Sheet1
#Gene	Length	Function Annotation	read_T	RPM_T	read_C	RPM_C	Log2(fold_change) normalized	q-value	Result
	(kbp)						(Top 10)	(Benjamini et al. 1995)
ETAE_2185	0.465	Hypothetical membrane protein	6154	3827.79	107	14.6925	8.02529	0	up
ETAE_2037	0.522	Kinesin protein	1603	997.065	37	5.08057	7.61655	0	up
ETAE_2186	0.378	Thioredoxin (H-type, TRX-H)	4397	2734.93	104	14.2805	7.58131	0	up
ETAE_2913	0.207	ADP-ribosylation factor GTPase activating protein	16	9.95199	0	0	7.17945	3.01e-11	up
ETAE_2431	0.492	Type VI secretion system protein EvpC	4486	2790.29	179	24.579	6.82685	0	up
ETAE_2187	0.729	Putative cytochrome c-type biogenesis protein（thiol:disulfide interchange protein DsbD-2）	5228	3251.81	213	29.2476	6.79678	0	up
ETAE_0666	0.642	Conserved inner membrane protein	2253	1401.37	104	14.2805	6.61664	0	up
ETAE_2429	0.516	Type VI secretion system protein EvpA	11065	6882.43	619	84.9965	6.33937	0	up
ETAE_2428	0.564	Type VI secretion system protein EvpP	3480	2164.56	195	26.776	6.33699	0	up
ETAE_2038	0.123	Hypothetical protein	351	218.322	20	2.74625	6.31285	1.21e-227	up
